1 **Keeping on target during a low-calorie diet: The experiences of participants in**  
2 **a type 2 diabetes reversal pilot.**

3 Latoya Bartholomew<sup>1¶</sup>, Nigel Unwin<sup>2,3\*&</sup>, Cornelia Guell<sup>4&</sup>, Madhuvanti M. Murphy<sup>2¶</sup>

4 1 - Faculty of Medical Sciences, University of the West Indies, Barbados

5 2 - George Alleyne Chronic Disease Research Centre, Caribbean Institute of Health Research  
6 University of the West Indies, Barbados

7 3 - MRC Epidemiology Unit, University of Cambridge, Cambridge

8 4 - European Centre for Environment and Human Health, University of Exeter, UK

9

10 Corresponding author

11 [Nigel.unwin@mrc-epid.cam.ac.uk](mailto:Nigel.unwin@mrc-epid.cam.ac.uk) (NU)

## 12 **Abstract**

13 Rapid weight loss using a very low-calorie diet (VLCD) for 2 to 3 months followed by weight  
14 maintenance has been shown to lead to the restoration of normal glucose and insulin metabolism  
15 in people recently diagnosed with type 2 diabetes. We explored the barriers and facilitators of  
16 adhering to a VLCD for remission in an Afro-Caribbean population. Twenty-five participants  
17 completed an eight-week VLCD followed by a six-month structured weight maintenance phase.  
18 Semi-structured interviews and focus groups were thematically analysed. Cravings for ‘usual  
19 foods’ consumed by friends and family, stigma of diabetes and resulting lack of disclosure and the  
20 participants’ busy schedules were noted as predominant challenges throughout the study. In turn,  
21 social support and the participants’ internal drive were considered as key facilitators for success.  
22 VLCD is a feasible approach for type 2 diabetes remission. Self-motivation and supportive  
23 environments are however crucial in meeting and maintaining the weight loss goals.

24

## 25 **Introduction**

26 Diabetes is a major global public health concern, with prevalence and mortality rates rising in both  
27 developed and developing countries alike [1, 2]. With a global prevalence estimated at 463 million  
28 adults as of 2019, these figures are projected to rise to 578 million by 2030, with type 2 accounting  
29 for 90% of all diagnosed cases [3]. Over the past decades the prevalence has risen faster in low  
30 and middle income countries when compared to high income countries [4, 5]. In developing  
31 countries in particular, adult diabetes numbers are likely to increase by 69% from 2010 to 2030  
32 compared to 20% for developed countries [1].

33 The high burden of type 2 diabetes has been linked to several wide-ranging complications which  
34 affect all aspects of an individual's quality of life. For the period 2000-2016, diabetes ranked  
35 among the three leading causes of death in the Region of the Americas [6], with the highest rates  
36 recorded in most countries of the English-speaking Caribbean [7]. In Barbados, approximately  
37 19% of adults have the illness with the prevalence being the highest for those 65 years and older  
38 [8]. In the 2019 Global Burden of Disease Study, diabetes was ranked the third leading cause of  
39 death and the number one health problem to cause the most disability for Barbadians [9].

40 Parallel to the increasing rates of diabetes is the epidemic of obesity. It is well established that  
41 overweight/obesity is the major modifiable risk factor for type 2 diabetes. In a 10-year follow-up  
42 study, Field et al. [10] found that those with a body mass index (BMI) of 35.0 or more were 20  
43 times more likely to develop diabetes than their same-sex peers with a BMI between 18.5 and 24.9.  
44 At the crux of these epidemics lie causes such as profound changes to work, transport and leisure,  
45 and changing physical and social environments including urbanisation leading to population  
46 changes in physical activity and poor nutrition [11]. Despite extensive health promotion initiatives  
47 and behaviour modification programmes, type 2 diabetes continues to be one of the most

48 challenging chronic illnesses to manage [12], and requires lifestyle changes and adherence to  
49 complex daily regimes including dietary modification and physical activity [13-16].

50 Although sustained behaviour modification is an important part of the prevention and treatment of  
51 diabetes, it remains elusive for many individuals [16]. This is so as one's dietary change can be  
52 affected by barriers related to self-discipline, emotions, knowledge, and access to social and  
53 financial resources. Moreover, the challenge of sustained behaviour modification is hinged on the  
54 influence of social factors on food accessibility and affordability, planning and preparation, and  
55 the central symbolic and emotional role food plays in one's social life. Interventions that aim to  
56 improve metabolic control must be able to address such complexities.

57 Weight loss has long been recognized as a key component in producing optimal outcomes for  
58 patients with diabetes. Recent studies provide compelling evidence that persons with type 2  
59 diabetes can return to normal glucose control through substantial weight loss achieved by adhering  
60 to a very low-calorie diet [17, 18]. Previous qualitative research however suggests that the  
61 adherence to such a diet is impacted by several barriers inclusive of tempting situations and  
62 environments, emotional distress, and high costs of healthy foods [19, 20]. This study thus  
63 explored the barriers and facilitators of adhering to an eight-week very low-calorie diet and  
64 maintaining the weight loss during the following six months.

## 65 **Materials and Methods**

### 66 **Study Design**

67 This work is part of a larger study that examined the feasibility of a very low-calorie diet and  
68 structured long-term support for inducing the remission of type 2 diabetes in Barbados. Following  
69 similar research conducted in the UK by Lim et al. [21] and Steven et al.[22], this study spanned

70 an eight-month period, with the first two months being for the very low-calorie liquid diet,  
71 followed by six months of structured weight maintenance. Ethical approval was obtained from the  
72 University of the West Indies Institutional Review Board and the Ministry of Health of the  
73 Government of Barbados. Written informed consent was secured from all participants.

74 Through purposive sampling, a total of 25 Barbadians who were diagnosed with type 2 diabetes  
75 for six years or less, between the ages of 20-69 with a body mass index of  $\geq 27$  kg/m<sup>2</sup> participated  
76 in the study. The 25 participants were divided into two cohorts: the first comprising of 13  
77 participants and the second, 12 participants. This division of the participants aided the researchers  
78 in ensuring that the data collection process for the weight loss phase (i.e., the first eight weeks)  
79 was managed effectively. The first cohort began their low-calorie liquid diet in March 2015 and  
80 continued until May at which point the second cohort began their eight-week low-calorie liquid  
81 diet. All participants stopped their use of hypoglycaemic medication on day one of the low-calorie  
82 liquid diet. The liquid diet comprised of four shakes per day, each containing 190 calories, 23  
83 grams carbohydrate, 10 grams protein and 7 grams fat. These shakes were supplied at no cost to  
84 the participants. Participants were also encouraged to consume three litres of water and to  
85 supplement their liquid diets with 250g of high fibre low carbohydrate vegetables daily.

86 Employing a 'before and after' design, the feasibility study assessed the primary outcome  
87 measures of a reduction in weight, fasting glucose, and estimated change in beta cell function. The  
88 secondary outcome measures such as reductions in the participants' waist circumference, blood  
89 pressure, adverse lipid profile and use of diabetes and blood pressure medication were also  
90 assessed.

## 91 **Setting**

92 Barbados is one of the most developed Caribbean economies that continues to make positive  
93 strides towards achieving its economic and Millennium Development Goals. Comprehensive  
94 health care is available to all citizens through the island's two-tiered healthcare system comprising  
95 of publicly funded and private clinics. In the public sector, primary, secondary, and tertiary levels  
96 of healthcare are regulated by the Ministry of Health. Citizens with diabetes can access primary  
97 care through the Ministry's nine polyclinics free of charge, or for a fee they can visit their private  
98 general practitioners [23, 24]. Through the Barbados Drug Benefit Service, citizens can access at  
99 any one time, a maximum of one month's supply of free medication [24]. For those patients with  
100 uncontrolled diabetes or who are at risk of complications, they are referred to the Barbados  
101 Diabetes Foundation's specialty clinic where they are managed at a fee for a six-month period  
102 after which time they are once again referred to the primary healthcare system. Although citizens  
103 have universal access to healthcare, the public system is fraught with challenges; these include  
104 long waiting times to be seen in the polyclinics, long waiting lists at the Queen Elizabeth Hospital,  
105 the main provider of acute secondary and tertiary care and medication supply problems in the  
106 polyclinics [24, 25].

## 107 **Data Collection and Analysis**

108 Individual in-depth semi-structured interviews were conducted with the 25 participants during the  
109 three main data collection time-points: baseline, eight weeks, and eight months. Furthermore, two  
110 focus group sessions each comprising of six participants were conducted at the end of the eight-  
111 week low-calorie diet. Key ideas, issues and concerns the participants had having completed the  
112 requirements of this critical juncture of the intervention were further explored.

113 The individual interviews explored barriers and facilitators participants experienced during the

114 intervention and ranged from 5-50 minutes in length, while the focus groups lasted no longer than  
115 an hour and thirty minutes. All but three interviews were recorded with the participants' consent  
116 and transcribed verbatim by LB. Detailed notes were however taken in the instance where the  
117 participant wished not to be recorded. Confidentiality and anonymity were maintained by  
118 assigning pseudonyms (used below) and removing any information which could be used to identify  
119 the participants.

120 All transcripts were reviewed in their entirety and notes were taken, as the researchers familiarized  
121 themselves with the data set. They were checked for accuracy and imported into ATLAS.ti 8.0  
122 data analysis software (ATLAS.ti Scientific Software Development GmbH, Berlin Germany). The  
123 data were subsequently analysed through thematic analysis. Utilizing an inductive approach, line  
124 by line coding was completed and initial individual codes were developed. Codes were then  
125 grouped, refined, and used to examine patterns, ambiguities, and outliers among the transcripts. A  
126 synopsis of the key themes, elucidated by relevant quotes are presented and discussed below.

## 127 **Results**

128 Of the 25 respondents who participated in this study, 10 were men and 15 were women with a  
129 mean duration of diagnosed diabetes of 3.0 (2.1) years. Table 1 provides an overview of selected  
130 baseline demographic characteristics.

131

132

133

134

135

136

137

138

139 **Table 1. Selected baseline characteristics of participants (N=25)**

| <i>Characteristic</i>              | <i>Men (N=10)</i> | <i>Women (N=15)</i> | <i>All (N=25)</i> |
|------------------------------------|-------------------|---------------------|-------------------|
| <b>Age, years</b>                  | 51 (12)           | 46 (9)              | 48 (10)           |
| <b>Ethnicity, %</b>                |                   |                     |                   |
| Black                              | 80                | 93                  | 88                |
| White                              | 0                 | 7                   | 4                 |
| Mixed                              | 20                | 0                   | 8                 |
| <b>Diabetes Treatment, %</b>       |                   |                     |                   |
| Diet only                          | 0                 | 20                  | 12                |
| Oral medication                    | 100               | 80                  | 88                |
| <b>Time since diagnosis, years</b> | 3.0 (1.8)         | 3.1(2.3)            | 3.0 (2.1)         |
| <b>Weight, kg</b>                  | 107.7 (22.3)      | 92.3(17.6)          | 98.5(20.7)        |
| <b>Height, cm</b>                  | 177.7 (8.9)       | 164.0(5.6)          | 169.5 (9.7)       |
| <b>BMS, kg/m<sup>2</sup></b>       | 33.9 (5.5)        | 34.4 (6.6)          | 34.2 (6.2)        |

140 *Note.* Data given as mean (SD) unless specified otherwise

141 The thematic analysis of the individual and group interviews revealed distinct challenges and  
142 facilitators of adhering to a low-calorie diet and maintaining weight loss for type 2 diabetes  
143 remission. Though there was some variation in the barriers and facilitators across the study's  
144 lifespan, five common themes were noted: (1) Barriers to lifestyle changes; (2) Situational Barriers  
145 (3) Attitudes towards diabetes; (4) Social Support and (5) Internal drive and self-motivation. These

146 themes have been structured and discussed below under the three critical categories (i.e., baseline,  
147 eight weeks, six-month weight maintenance) of the study.

148

### 149 **Barriers to lifestyle changes**

150 During the baseline interviews, participants noted the difficulty they experienced maintaining a  
151 healthy lifestyle. This difficulty, they explained, stemmed mainly from their inability to maintain  
152 a healthy diet due to busy schedules, family responsibilities, desk-bound sedentary jobs and  
153 frequent choice of convenience food and eating out.

154 Within their households, participants noted consistent struggles with temptations as their family  
155 members consumed foods that were not ‘diabetes friendly’. The female participants expressed the  
156 heightened challenges they experienced as they were the ones tasked with the responsibility of  
157 preparing meals. To address this challenge, they attempted to cook separate meals for themselves  
158 and their family, a task which they agreed was difficult to maintain in the long run because of their  
159 busy schedules. As such, they reverted to consuming the same meals (which were typically high  
160 in carbohydrates, sugars, and fats) prepared for other members of the household, which made them  
161 question their ability to stick to the very low-calorie liquid diet. They perceived that they would  
162 experience ‘withdrawal symptoms’, such as hunger pangs, having low energy, and experiencing  
163 excessive headaches during the eight-week diet since they could no longer consume their favourite  
164 foods and drinks.

165 Throughout the formative weeks of the largely liquid diet, participants unequivocally expressed  
166 that their major challenge stemmed from temptations and cravings for ‘usual foods’. It was evident  
167 that the special low-calorie liquid diet was unlike any other diet they attempted in the past and this

168 resulted in varying levels of deviation among participants as they gave into their impulses,  
169 particularly in the home eating environment.

170 I was really craving food and I found it was harder for me the days when I was  
171 home. I am home on my off day and of course you've got your little house work  
172 and thing to do but you're not as busy as you would be when you're at work and  
173 stuff. So then it was really, really hard and I had to find things to do to keep my  
174 mind occupied; call my husband, call my friends, anybody to talk me out of  
175 cheating. [Female participant 1- Focus Group]

176 As was discovered at baseline, the participants' temptations were intensified as family members  
177 continued with their dietary habits which were seen as 'triggering'. Some participants' immediate  
178 family members had no regard for the change they were making as no consideration was given to  
179 the impact their dietary choices may have had on the participant's efforts.

180 From day 1 it was like if they [the participant's family members] were conspiring  
181 against me. I called that a conspiracy because is like Tuesday before was mackerel,  
182 before that was tuna and then all of a sudden in comes out of nowhere the first time  
183 in like 6 months they decided 'oh you start the diet?' [here's] fried chicken. [Male  
184 participant 1 – Eight week interview]

185 It was also discovered that the recommended foods for the low-calorie diet proved difficult for  
186 some to consume. Many reported that the consumption of non-starchy vegetables became  
187 monotonous as they were ill equipped with creative ways for preparing their vegetarian meals.  
188 Their creativity with their meal preparation was further stunted due to the availability and  
189 accessibility of vegetable options as participants found the cost of vegetables was far too expensive  
190 especially at the supermarket.

191 So that's one of the things that had me a bit frustrated cause now I have to buy more  
192 vegetables than I normally would have and then seeing how expensive you know it  
193 was. I'm like 'why is it that the things that are good for us so expensive?' And I  
194 mean and I'm complaining right and I am working and my husband is working.  
195 How about those who probably have to support a household on their own and have  
196 to be on a diet like that you know? Can they afford it you know? [Female participant  
197 1- Focus Group]

198 Additionally, some participants found it challenging to consume the recommended daily volume  
199 of water which led to them experiencing hunger pangs, ultimately resulting in them indulging in  
200 foods they were not supposed to consume. Despite these challenges with the recommended diet,  
201 most participants preferred the rigidity of this phase of the study as it was a guaranteed way for  
202 achieving drastic weight loss- a desired outcome identified by most participants during the baseline  
203 interviews. Moreover, participants appreciated the fact that they did not have to “think too much”  
204 about the caloric content of the foods consumed. They agreed that the special low-calorie liquid  
205 diet made it easier for them to keep calories down and achieve their weight loss.

206 Despite their initial fears for the low-calorie diet, the participants all agreed that they were  
207 particularly concerned about transitioning into the final phase of the study. The flexibility they had  
208 with their food choices in the weight maintenance phase, made them quite anxious that they would  
209 revert to old habits. Like the other two junctures, food posed the greatest challenge for them during  
210 this final phase. Their difficulty in this instance however, revolved around understanding portion  
211 and serving sizes, meal planning and staying within the calorie count. To address these challenges,  
212 some opted at using calorie counting applications, while others kept food diaries. These two  
213 solutions were however short-lived as participants either failed to continuously log foods

214 consumed, or the application they used focused more on westernized foods and very little on  
215 Caribbean meals. In the instance of the latter, they used their own estimations to calculate their  
216 daily calorie count which may not have been a true reflection of their daily intake.

217 The cost of the healthy foods continued to be a challenge for some during the six-month weight  
218 maintenance phase. Participants struggled with determining which types and combinations of  
219 foods they could consume given their financial and caloric constraints. To offset the costs of foods  
220 some opted at starting their own kitchen gardens while others received their supply of fresh  
221 vegetables from friends and family members who also had kitchen gardens or from vendors who  
222 sold them at a cheaper price.

### 223 **Situational Barriers**

224 It was generally difficult for the participants to manage their food choices at social events and  
225 gatherings. As food plays a substational role in the Barbadian culture, participants noted the  
226 heightened peer pressure they experienced while in social settings. From their accounts, it is clear,  
227 that culturally they were expected to consume a large volume of food and drink when out at social  
228 gatherings. Failure to consume large volumes of food and drink thus resulted in interrogation from  
229 their peers as demonstrated in the quote below.

230 ... the greatest difficulty to manage the diet as such would be only in social  
231 settings...You know how Bajans are ‘you aint eating nothing?’ ‘You only eating  
232 that?’ So, I guess that’s within this setting, but if you’re outside of this country and  
233 you go places people don’t expect you to have a plate full or overflowing of things.

234 [Female participant 2- Eight-week interview]

235 Furthermore, their failure to consume large volumes of regular food and drink was perceived to be  
236 rude and a deviation from the cultural norm.

237 ...I'll find other options that will make him [participant's boyfriend] feel  
238 comfortable with me being social in that sense...because he has this thing when we  
239 go to people's houses and I say, 'thanks no', 'you can't tell people no, they invite  
240 you to their house and offer you something you have to take it.' You know and he  
241 says, 'you can't go in people's house and not take what they offer you...they'll feel  
242 that you think what they have is not good enough'. [Female participant 3- Eight-  
243 week interview]

244 In some instances, participants thus felt it best to minimize the number of social events they  
245 attended to not appear to be flouting cultural norms. Some were overly critical basing their decision  
246 to only attend those events where they felt they had control of decision-making around food  
247 consumption. It is interesting to note, though participants were generally tight-lipped about their  
248 diabetes diagnosis, some felt it useful to disclose their diagnosis and involvement in the study to  
249 address the peer pressure experienced.

250 The limited healthier food options available at recreational facilities proved problematic for  
251 participants even when socializing with persons who were supportive of their lifestyle changes.  
252 One participant termed her experience as a "diabetic discrimination" as she recalled the resistance  
253 she and her family experienced at the cinema when she attempted to take along her meal  
254 replacement shake. It was only when she highlighted her involvement in the study and threats of  
255 the ramifications of a drop in her blood sugar levels were made, did they allow it.

256 There was consensus that all participants experienced shortcomings maintaining their diet because  
257 of their daily schedules. It was found that those who had particularly demanding work and family

258 life schedules were more likely to skip meals, purchase unhealthier food on the go and or deal with  
259 temptations associated with socializing with their business partners. Furthermore, their high stress  
260 work environment often led some participants to emotionally eat (consumed large portions of  
261 unhealthy foods). For those participants working in the food industry, the work environment posed  
262 a unique challenge as the smell and taste of the foods intensified their cravings. Participants were  
263 therefore forced to strategically plan and prepare meals especially during the low-calorie diet  
264 phase.

265 Finally, during the six-month weight maintenance phase, participants noted that they had trouble  
266 managing their food choices and addressing peer pressure to indulge in the foods prepared over  
267 the Christmas holiday and long weekends with Bank holidays. Culturally, these holidays are  
268 celebrated with friends and family with large volumes of food and drink that typically are high in  
269 starches and sugars. All participants agreed that their weight and blood sugar levels fluctuated  
270 during this phase. This outcome thus propelled some of them to revert to versions of the low-  
271 calorie diet.

## 272 **Attitudes towards diabetes**

273 At baseline, the participants highlighted their struggles with their diabetes care and management.  
274 In addition to their inability to religiously take their medication on time, some participants  
275 unequivocally expressed their dislike for taking their medication. For most of them, the fact that  
276 they were not expected to take their medication during the course of the study served as motivation  
277 to participate and follow the guidelines of the intervention.

278 It was also observed that participants associated fear with their diabetes. They expressed the  
279 heightened sense of anxiety they experience as they think about the complications associated with  
280 the illness. One female participant recounted:

281 Maintaining this type of eating is really difficult. I am really trying because I have  
282 a fear of amputation...I don't want to lose any of my limbs so I'm trying to stick to  
283 a particular way of eating. So I make sure I, you know I stock up on a lot of  
284 vegetables and as I said my sister helps me. So she makes sure that I eat what I am  
285 supposed to eat. [Female participant 4- Baseline interview]

286 Despite the fear they associated with the illness, participants usually reverted to their normal eating  
287 habits out of frustration generated by not knowing what combination of foods they should  
288 consume. When asked how diabetes has affected her daily life, one participant noted:

289 It affects [me] due to the things that you see and you hear about the kidney problems  
290 and the heart problems and so on. I said 'it is so dangerous that I wouldn't like to  
291 find that I lose a kidney or so'. So it has got me scared. At first when I heard about  
292 it I was like 'oh shoot I have to come off so much things, what am I going to eat?'  
293 Then when to find out that the majority of the vegetables that you're eating have  
294 sugar, like carrots and so on and you have been eating carrots all the time saying  
295 'oh it is good for your eyes, oh it's good' then to find out that it have a lot of sugar  
296 in it. What are diabetes people going to eat when the food have the sugar, the  
297 vegetables have the sugar, the fruits have the sugar? What are we going to eat? I  
298 does have to question myself 'look eat something, you have to live too'. So  
299 sometimes I fall back on the cake and things like that cause sometimes you don't  
300 know what to eat. [Female participant 5- Baseline interview]

301 It became more evident that there is a general negative perception of diabetes within the Bardadian  
302 culture. During the eight-week diet phase, participants spoke of the sense of embarrassment they  
303 felt because of their illness. Though some openly divulged information regarding their illness and

304 by extension the details of their involvement in the study to address peer pressure, there were  
305 participants who withheld such information from their co-workers, peers and even family  
306 members. Some participants also expressed the reservations their social network members had  
307 about them openly sharing information about their illness with others. One male participant during  
308 the group interviews noted “I remember people saying ‘But Carlvin you let people know that? You  
309 aint shame?’... My mother was actually like ‘but Carlvin I would not let anybody know. You know  
310 how Bajans are.’”

311 Furthermore, while rapid weight loss was the main goal of the eight-week diet phase, it became  
312 apparent that the public’s negative perception of diabetes influenced the types of comments  
313 participants received. Though the quick weight loss was generally perceived as positive for the  
314 females the converse was true for the males. During the focus groups the female participants noted  
315 that while others commended them for their weight loss, their comments were sometimes flanked  
316 by statements as “try and not get too small”. They associated such comments with the culture’s  
317 African roots where being voluptuous is perceived as healthy. For the men on the other hand, their  
318 rapid weight loss was associated with HIV/AIDS and a loss of their ‘manhood’. The negative  
319 comments they received presented them with psychosocial barriers which they needed to  
320 overcome. In some instances, this proved to be a difficult task as it affected how some male  
321 participants continued to progress in the study as they were more likely to modify the intervention  
322 plan as to not lose too much weight too quickly.

323 I think when I first started the study I was either 206 or 207 pounds and now I’m  
324 down to 192. So it means that I have lost about 14 or 15 pounds during the last 3  
325 weeks or so. I think if I get down to like say 180, another 12 pounds like that would  
326 be my ideal weight if I could keep everything tight and so on. Umm but I really

327 don't want to go beyond that because then you would excite too much curiosity on  
328 the part of the ungodly as to whether or not in your old age you have been with a  
329 young girl and captured HIV/AIDS and so on. General foolish comments. [Male  
330 participant 2- Baseline interview]

### 331 **Social Support**

332 During the baseline interviews all participants agreed that they needed support from their family  
333 and peers. They felt that their family members would play a critical role in minimizing the  
334 temptations within the household. Although they asserted that they would appreciate constant  
335 reinforcement and reminders from their family and peers, there was a thin line between this  
336 behaviour being perceived as supportive versus what they deemed as 'negative support' (e.g. any  
337 support that was given in a chastising manner).

338 There was a resounding consensus among participants, across the interviews and focus groups that  
339 support was an instrumental component for the successful completion of the eight-week diet.  
340 Though they differed with respect to their choice of support, it was found that they opted at  
341 sourcing assistance from family members, close friends, and co-workers. It was observed that their  
342 support systems provided them with assistance in purchasing and or preparing meals, giving words  
343 of encouragement, and monitoring their daily food consumption and general well-being. Some  
344 participants were fortunate to have their family members and friends join them using a modified  
345 version of the low-calorie diet. It is important to note however, others had trouble obtaining support  
346 from family members which they believed influenced their abilities to achieve the type of results  
347 they wanted. In such instances, they relied heavily on the support of their friends, or their own  
348 volition.

349 Another key source of support for participants were others involved in the study. Many expressed

350 that they drew closer to other participants and members of the research team as they sought  
351 emotional, tangible and information support. They all expressed similar opinions on the utility of  
352 the weekly visits with the Clinical Investigator and calls by the research assistants. This, they  
353 agreed, gave them a sense of accountability, and made them feel as though there were persons who  
354 truly cared about their well-being.

355 Interestingly, as the level of the research team's support was intentionally changed in the final  
356 phase of the study, it was found that participants felt it was easier for them to slip back into their  
357 bad habits. When asked how easy or difficult it would be for them to continue with the maintenance  
358 phase on their own, one participant stated:

359         Difficult in that you know, being that I know I have to come and see Dr. Brown,  
360         you want to be on your best behaviour and you do things a certain way. Then you  
361         meet the others and you want to be able to say good things too...If that is gone I  
362         think it may be a lil easier to slip back into [bad habits] but then you got to remind  
363         yourself why you are doing it. It is not for Dr. Brown, it is not for this person, it is  
364         for me, it is for myself, it is for my health, you know. And I guess that is where the  
365         difficulty [lies]; you would miss that, that part of the support.[Female participant 6-  
366         Eight-month interview]

367 With the absence of the research team's weekly phone calls and check-ups, the participants created  
368 a WhatsApp chat group to motivate one another. Again, this group was deemed an important  
369 source of accountability and a forum to share strategies used to overcome any short comings and  
370 challenges they experienced during the weight maintenance phase.

371 Though a change in the support was observed during the final phase of the study, participants'  
372 social network members continued to offer them encouragement, reminders, and joined in their

373 exercise regimes. Participants expressed that the change in support stemmed from the fact the  
374 structure of the eight-week low-calorie liquid diet was one where the restrictions and requirements  
375 were more quantifiable thereby making it easier for others to provide the types of assistance they  
376 required. On the other hand, the scepticism that some faced during their diet was changed into  
377 positive feedback and praise. With the participants' result being more noticeable, it appeared that  
378 others were more willing to desist from pressuring them to revert to their bad eating habits while  
379 others went as far as to mirror their behaviours.

### 380 **Internal drive and self-motivation**

381 The participants' willpower proved particularly useful during the eight-week very low-calorie diet.  
382 They all acknowledged that though social support was necessary at times, their ability to  
383 successfully complete the low-calorie liquid diet was solely up to them. Their level of self-  
384 motivation grew as they saw their weekly results (weight loss and reductions in blood sugar and  
385 blood pressure levels). Some were particularly motivated by the fact that they were no longer  
386 dependent on medication to manage their different chronic illnesses. More importantly, most  
387 participants' self-efficacy improved by the end of the eight-week period as they believed the  
388 rigidity of the study's restrictive diet helped them to develop new eating habits needed for the  
389 considerable weight loss they failed to achieve in the past. Although no gender specific differences  
390 were found, it was unearthed that participants who incorporated exercise during the low-calorie  
391 diet, researched foods and suitable portion sizes were better equipped to address the challenges of  
392 the diet. These participants felt better overall (mentally and physically), and they were generally  
393 the ones who saw the biggest changes in their baseline measurements.

394 It is also worthy to note that there was a concomitant improvement in most participants' ability to  
395 resist temptations as their perceived self-efficacy grew. Participants planned, prepared, and pre-

396 packaged their meals to take with them when they were on the go; some even utilized this strategy  
397 when attending social events. Most reported that they did not previously pre plan nor pay attention  
398 to the types of foods consumed. As such, this strategy proved quite useful as it helped to ensure  
399 that participants stuck to their restrictive diet.

400 Participants who did particularly well in maintaining their weight, blood glucose, and blood  
401 pressure levels highlighted that this success was due to their consistent research on the optimal  
402 combination of food groups, portion sizes and daily caloric intake. They consciously made efforts  
403 to increase and maintain their consumption of vegetables, measure their foods using either a  
404 kitchen scale and or measuring cups, examine the nutritional information on food labels and  
405 calculate the number of calories expended daily.

406 Given the greater freedom in their food consumption choices, many spoke of their desire to  
407 maintain the practices and behaviours developed over the first two months of the study to “get rid”  
408 of their diabetes. Their strong dislike for taking medication and the results they obtained served as  
409 a catalyst for their drive to maintain a healthy lifestyle. Moreover, some participants spoke of their  
410 desire to serve as an example for others in their family and the wider society at large. In the instance  
411 of the former, participants saw the need to demonstrate to others in their inner circles that they  
412 could successfully complete the study and reap the benefits of their efforts. With the high  
413 prevalence of diabetes in Barbados, they felt that by sticking to the programme they would be  
414 better equipped to assist other citizens living with the disease.

## 415 **Discussion**

416 This study provides insight into the challenges and facilitators experienced by 25 Barbadians who  
417 participated in an intervention aimed at type 2 diabetes remission. While the current study shares

418 similarities with the findings of Rehackova et al.[20], our analysis revealed more culturally related  
419 situational barriers across various settings and a negative attitude towards type 2 diabetes as  
420 predominant challenges. The participants' internal drive and self-motivation along with social  
421 support facilitated their adherence to the low-calorie liquid diet and structured weight maintenance  
422 over a six-month period. Despite the excessive use of self-control rhetoric in the literature  
423 regarding diabetes management, our data supports Albert Bandura's assertion that most human  
424 behaviour is determined by multiple interacting factors [26]. The data clearly demonstrates the  
425 interconnectedness of intrapersonal and interpersonal influences for type 2 diabetes remission  
426 within the Barbadian context.

#### 427 **Findings in context**

428 Based on the Social Ecological model, behaviour change is maximised when there is an interaction  
429 between the multiple levels (intrapersonal, interpersonal, organizational, community) of influence  
430 on specific health behaviours [27]. Our findings elucidate the wider cultural norms with respect to  
431 food consumption within the Barbadian social setting. The participants' wishes to refrain from  
432 certain foods and drink were usually met with resistance by others around them, as food is a central  
433 aspect of the culture. Moreover, food has significant symbolic and social meanings as it revolves  
434 around the bonds created and nourished through the preparation and consumption of meals [28-  
435 31]. In this regard, it plays an integral role in the maintenance of familial and social networks.  
436 Participants were thus faced with heightened levels of temptation, especially during the formative  
437 weeks of the intervention, to consume 'regular foods' as culturally they were expected to consume  
438 large volumes of food and drink when out at social gatherings. Their levels of perceived control in  
439 these settings were constantly challenged as they progressed through the phases of the study. In

440 some instances, they experienced great difficulty in maintaining control, giving into the peer  
441 pressure and as such negatively impacting the behaviour required to reverse their diabetes.

442 Furthermore, the findings of this study mirror other qualitative research which suggest that social  
443 functions impede the dietary alterations required for effective diabetes care [13, 32-36]. The  
444 participants' refusal to consume large volumes of regular food and drink was not socially  
445 acceptable and was considered to be a deviation from cultural norms. Peer pressure worsened if  
446 they did not wish to disclose their diabetes as their reason for what seemed to others to be unusual  
447 consumption behaviour. Though some were generally tight-lipped about their diabetes diagnosis,  
448 some felt it useful to disclose their diagnosis to address the peer pressure experienced. Members  
449 of their social network however, appeared to be more willing to accept their wishes to refrain from  
450 'regular foods' only after their involvement in the study was disclosed. Nonetheless, the data is  
451 indicative of the high level of resiliency and the positive temperament towards problem solving  
452 and logical decision making required to successfully manage the behaviour required for type 2  
453 diabetes remission.

454 Family dietary behaviours also represents one of the major challenges for persons with type 2  
455 diabetes [16, 37-39]. Within the home environment, the data revealed the heightened levels of  
456 temptations participants faced on a regular basis and the overt ridicule and sabotage they  
457 experienced as they did their best to engage in the recommended behaviour. Such stigma and  
458 ridicule thus increase the likelihood that the requisite self-care behaviours for remission may be  
459 compromised [40, 41]. Furthermore, consistent with previous research, the challenges participants  
460 experienced making the requisite dietary changes were intensified if their family members were  
461 not necessarily willing to follow their diet regimen and at the congregate meal sites they continued  
462 eating their regular meals [16, 35, 39, 42, 43]. Indeed, the integration of their new dietary habits

463 with their families culturally established dietary habits and preferences presented a major barrier  
464 to their dietary change and adherence [16, 44, 45]. Diabetes-friendly substitutes and cooking  
465 methods appeared less appealing and compounded the participants' temptation when we consider  
466 their traditional cooking methods of using saturated fats for frying and sugar for stewing meats for  
467 example. Having difficulty with finding appealing ways to prepare their meals, participants  
468 therefore complained of the monotony of the foods they ate during the low-calorie diet; some  
469 resorted to simply eating their vegetables raw while others ate them in soups. Again, in these  
470 instances, the urge to consume regular foods was further intensified and lead to lapses in their  
471 dietary adherence.

472 The participants' narratives revealed that while modifying their dietary behaviour, female  
473 participants were faced with a unique challenge as they were still responsible for purchasing and  
474 preparing meals for their family. In this regard, their needs were secondary to those of the other  
475 members of the household as they had a sense of obligation towards fulfilling their dietary wishes  
476 and needs. While the male participants may have had their meals prepared by their spouses or  
477 significant others, there was limited or little control over foods prepared. Although this finding  
478 maybe suggestive of a gendered problem, more research is required to confirm the impact of the  
479 family's influence on the diet modification efforts Barbadian males and females are required to  
480 make to reverse their diabetes.

481 In the instance of the work environment, some faced challenges balancing their erratic work  
482 schedules with the demands of their family life and that of the study. Their irregular work hours  
483 primarily adversely impacted their ability to eat on time. In some instances, participants either  
484 missed meals or they were forced to consume unhealthy foods as these were easier and more  
485 convenient to grab on the go. Social events and meetings within the work setting also proved

486 particularly problematic as more often than not unhealthy foods inclusive of fried foods, cakes and  
487 pastries were at the crux of these gatherings. To minimize social isolation and the negative impacts  
488 associated with a decline of foods offered, they sabotaged their progress by partaking in the foods  
489 served. This finding thus suggests that the participants' colleagues were not necessarily sensitive  
490 to their needs and the work environment presents significant barriers which can have deleterious  
491 effects on their diabetes remission efforts.

492 The limited healthy food options provided at recreational facilities also demonstrate a greater need  
493 for facilitative environmental changes that can drive the healthy lifestyle behaviours required to  
494 effectively manage and or reverse one's diabetes. With an overabundance of low-cost, high energy  
495 dense manufactured foods and an adoption of a Western oriented diet, it is not surprising that there  
496 is an upward shift towards the production of foods that are high in fats and calories and low in  
497 fibre, vitamins, and minerals [46, 47]. The country's import policies and high food importation  
498 bills are indicative of its colonial legacy and intrigue for imported foods which are perceived to be  
499 of a superior quality, cheaper, and trendier than locally produced foods and a symbol of one's  
500 social status [48, 49]. Consequently, this resulted in the morphing of an environment characterized  
501 by a proliferation of cheap foods with low nutritional value, while more appropriate, healthier  
502 options for those with diabetes are high in cost [24]. If participants are to maintain their newly  
503 adopted healthier lifestyle, the wider environment must support healthful choices [50-54]. As  
504 asserted by the aforementioned authors, the skills garnered over the course of this intervention  
505 would be of little utility if individuals do not have access to healthy foods and safe settings for  
506 physical activity. The absence of such resources thus impedes one's ability to maintain the healthy  
507 diet and healthy levels of physical activity required for type 2 diabetes remission.

## 508 **New perspectives and future interventions**

509 The significance of food in the Barbadian culture represents a major consideration in the remission  
510 of type 2 diabetes. Future interventions need to provide participants with information and strategies  
511 which are specific to their preferences and needs. More specifically, participants need to be taught  
512 how to incorporate traditional foods and cooking practices in their new dietary regime, how to read  
513 and make sense of food labels, how to prepare healthy meals when they have limited time and or  
514 cooking skills and how to address social gatherings, cravings and slip ups they may experience  
515 [44, 45, 55, 56]. These strategies will thus aid in minimizing the stressors associated with them  
516 deviating from the cultural norms and social isolation they may experience as a result of not being  
517 fully able to participate in social occasions because of their dietary needs.

518 It is understandable that participants are faced with multiple barriers due to the diverse activities  
519 they engage in daily. Rooted in an ecological perspective, it is crucial that the routines, resources,  
520 and activities of the participants' households are considered and accommodated as they make  
521 efforts towards behaviour change [45, 57, 58]. To this end, it would prove immensely useful to  
522 intimately involve members of the participants' social network (particularly their family and  
523 friends) as they have crucial roles in their decisions. From an intrapersonal level, it is critical that  
524 individuals are taught concrete behaviours and skills with an aim towards empowering and  
525 providing them with autonomy in the decision-making processes associated with the health  
526 behaviours required for type 2 diabetes remission.

527 There is a need for ongoing follow-up and support for behaviour change. As was seen with the  
528 study's weekly visits, the Clinical Investigator provided critical assistance in refining the  
529 participants' problem-solving skills, she encouraged them when their test results were less than  
530 perfect and guided them on how to respond to new issues that emerged. It was not surprising that

531 participants felt a high degree of accountability to the chief investigator. Their concerns about their  
532 ability to effectively transition to the maintenance phase is indicative of their desire for continuous  
533 reinforcement and formal support which they perceived to be crucial for their successful  
534 completion of the study. In the absence of the formal support provided by the research team, they  
535 relied on one another. When they deviated off course, they drew on encouragement from each  
536 other; some modelling their behaviours to that of other participants who successfully devised  
537 strategies for addressing challenges faced. This finding thus demonstrates the utility of having  
538 others around who can demonstrate the small steps that can be taken to achieve a complex goal.

539 The data underscores the importance of an interpersonal level of influence to aid in the  
540 improvement of the participants' self-efficacy. Though they differed with respect to their choice  
541 of support it was found that participants opted at sourcing assistance from family members, close  
542 friends, members of the research team inclusive of other participants and co-workers. Most  
543 however stated that family members were their major support system, providing them with  
544 assistance in purchasing and preparing meals, giving words of encouragement, and monitoring  
545 their daily food consumption and general wellbeing. This finding echoes the work of Vassilev et  
546 al. [59] which illustrates the critical role of family members in the management of one's chronic  
547 illness. However unlike Vaccaro et al. [60] and Barrera et al. [61] who posited that there was a  
548 strong correlation between family social support and diabetes self-management among ethnic  
549 minorities, the preliminary data does not coincide with these results. Though participants of the  
550 study are generally members of a homogenous ethnic group, some had trouble obtaining consistent  
551 supportive behaviour from family members whom they believed influenced their abilities to  
552 achieve the type of results they wanted.

553 Whilst the abovementioned level of influence proved useful in assisting participants to overcome  
554 challenges faced, the intrapersonal level was perceived to be a critical facilitator throughout the  
555 lifespan of this intervention. This level of influence was indicative of the grave responsibility  
556 participants had, not only to induce lifestyle changes by joining the study, but also to maintain the  
557 healthy alternatives they adopted as they progressed through the intervention. Though difficult to  
558 achieve in practice, they took charge of developing strategies that aided in the improvement of  
559 their self-efficacy. Consequently, through strategic goal setting, planning and pre-preparation of  
560 meals, participants overcame daily challenges. More importantly, by doing such they were able to  
561 meet their goals which was evident in the sustained reduction of their baseline measurements.

#### 562 **Strengths and limitations**

563 Being the first study of its kind to be conducted in a Global South setting among an Afro-Caribbean  
564 population, this study provides unique insights into the barriers and facilitators to type 2 diabetes  
565 remission. It highlights the reciprocal interactions between intrapersonal, social, and  
566 environmental variables and the deep-seated impact of cultural influences on one's efforts for  
567 dietary induced diabetes remission. Although the experiences of a small sample of participants  
568 were captured, this study provides valuable information for the development of future diabetes  
569 remission interventions in Barbados and has implications for similar programmes in other  
570 countries of the Caribbean. However, given the study's rigidity (e.g., provision of meal  
571 replacements, structured monitoring, and provision of support from the intervention team), it is  
572 unclear if similar results would be obtained in primary healthcare settings where similar resources  
573 may not necessarily be available.

## 574 **Conclusion**

575 This study examined the barriers and facilitators 25 Barbadians experienced as they progressed  
576 through three phases of a diabetes reversal feasibility study. The data revealed that there were  
577 interrelated and overlapping barriers including the social significance of food and the associated  
578 temptations and family and social support. In the same vein, social support received from  
579 participants' social relationships and members of the study was deemed critical for their successful  
580 completion of the intervention. At the intrapersonal level of influence, the participants' self-  
581 efficacy and determination was an equally important facilitator for the completion of the  
582 intervention.

## 583 **Acknowledgements**

584 We wish to acknowledge the contributions of the Barbados Diabetes Association, the Barbados  
585 Diabetes Foundation, and the George Alleyne Chronic Disease Research Centre. For their  
586 assistance with the data collection, we thank Dr. Karen Bynoe, Andre Greenidge, Melissa Abed,  
587 and Krystal Boyea. Finally, we thank Professor Roy Taylor, the study's Co-principal Investigator,  
588 who assisted in establishing the study and the protocols for the very low-calorie diet phase and the  
589 metabolic outcome measures.

590

## 591 **References**

592

593 1. Shaw JE, Sicree RA, Zimmet PZ. Global estimates of the prevalence of diabetes for 2010  
594 and 2030. *Diabetes Res Clin Pract.* 2010;87(1):4-14. Epub 20091106. doi:

595 10.1016/j.diabres.2009.10.007. PubMed PMID: 19896746.

596 2. Hu F. Globalization of Diabetes: The role of diet, lifestyle, and genes. *Diabetes Care.*

597 2011 34(6):1249-57. doi: 10.2337/dc11-0442.

598 3. Saeedi P, Petersohn I, Salpea P, Malanda B, Karuranga S, Unwin N, et al. Global and

599 regional diabetes prevalence estimates for 2019 and projections for 2030 and 2045: Results from

600 the International Diabetes Federation Diabetes Atlas, 9th edition. *Diabetes Research and Clinical*

601 *Practice.* 2019;157:107843. doi: <https://doi.org/10.1016/j.diabres.2019.107843>.

602 4. World Health Organization. *Global Report on Diabetes.* 2016.

603 5. Muchiri J, Gericke G, Rheeder P. Stakeholders' perceptions of dietary and related self-

604 management challenges and education programme preferences for type 2 diabetes adults. *Journal*

605 *of Endocrinology, Metabolism and Diabetes of South Africa.* 2018;24:1-9. doi:

606 10.1080/16089677.2018.1541211.

607 6. Caribbean Public Health Agency. *State of public health in the Caribbean region 2014–*

608 *2016. Building resilience to immediate and increasing threats: Vector-borne diseases and*

609 *childhood obesity.* CARPHA Port of Spain, 2017.

610 7. Pan American Health Organization. *NCDs at a Glance: NCD Mortality and Risk Factor*

611 *Prevalence in the Americas.* 2019.

612 8. Unwin N, Rose AMC, George KS, Hambleton IR, Howitt C. *The Barbados Health of the*

613 *Nation Survey: Core findings.* St Michael Barbados Chronic Disease Research Centre, The

614 *University of the West Indies and the Barbados Ministry of Health* 2015.

- 615 9. Vos T, Lim SS, Abbafati C, Abbas KM, Abbasi M, Abbasifard M, et al. Global burden of  
616 369 diseases and injuries in 204 countries and territories, 1990-2019: A systematic analysis for  
617 the Global Burden of Disease Study 2019. *The Lancet*. 2020;396(10258):1204-22. doi:  
618 10.1016/S0140-6736(20)30925-9.
- 619 10. Field AE, Coakley EH, Must A, Spadano JL, Laird N, Dietz WH, et al. Impact of  
620 overweight on the risk of developing common chronic diseases during a 10-year period. *Arch*  
621 *Intern Med*. 2001;161(13):1581-6. doi: 10.1001/archinte.161.13.1581. PubMed PMID:  
622 11434789.
- 623 11. de Lusignan S, Sismanidis C, Carey IM, DeWilde S, Richards N, Cook DG. Trends in the  
624 prevalence and management of diagnosed type 2 diabetes 1994–2001 in England and Wales.  
625 *BMC Family Practice*. 2005;6(1):13. doi: 10.1186/1471-2296-6-13.
- 626 12. Sinclair KiA, Makahi EK, Shea-Solatorio C, Yoshimura SR, Townsend CKM,  
627 Kaholokula JKa. Outcomes from a Diabetes Self-management Intervention for Native Hawaiians  
628 and Pacific People: Partners in Care. *Annals of Behavioral Medicine*. 2012;45(1):24-32. doi:  
629 10.1007/s12160-012-9422-1.
- 630 13. Halali F, Mahdavi R, Mobasser M, Asghari Jafarabadi M, Avval S. Perceived barriers to  
631 recommended dietary adherence in patients with type 2 diabetes in Iran. *Eating Behaviors*.  
632 2016;21:205-10. doi: 10.1016/j.eatbeh.2016.03.001.
- 633 14. Carpenter R, DiChiacchio T, Barker K. Interventions for self-management of type 2  
634 diabetes: An integrative review. *Int J Nurs Sci*. 2018;6(1):70-91. doi:  
635 10.1016/j.ijnss.2018.12.002. PubMed PMID: 31406872.

- 636 15. Concha JB, Kravitz HM, Chin MH, Kelley MA, Chavez N, Johnson TP. Review of Type  
637 2 Diabetes Management Interventions for Addressing Emotional Well-Being in Latinos. The  
638 Diabetes Educator. 2009;35(6):941-58. doi: 10.1177/0145721709344125.
- 639 16. Vanstone M, Rewegan A, Brundisini F, Giacomini M, Kandasamy S, DeJean D. Diet  
640 modification challenges faced by marginalized and nonmarginalized adults with type 2 diabetes:  
641 A systematic review and qualitative meta-synthesis. Chronic Illness. 2016;13(3):217-35. doi:  
642 10.1177/1742395316675024.
- 643 17. Taylor R. Remission of type 2 diabetes by weight loss in a non-white population. The  
644 Lancet Diabetes & Endocrinology. 2020;8(6):458-9. doi: 10.1016/S2213-8587(20)30147-9.
- 645 18. Lean ME, Leslie WS, Barnes AC, Brosnahan N, Thom G, McCombie L, et al. Durability  
646 of a primary care-led weight-management intervention for remission of type 2 diabetes: 2-year  
647 results of the DiRECT open-label, cluster-randomised trial. The Lancet Diabetes &  
648 Endocrinology. 2019;7(5):344-55.
- 649 19. Harper C, Maher J, Grunseit A, Seimon RV, Sainsbury A. Experiences of using very low  
650 energy diets for weight loss by people with overweight or obesity: A review of qualitative  
651 research. Obes Rev. 2018;19(10):1412-23. Epub 20180824. doi: 10.1111/obr.12715. PubMed  
652 PMID: 30144269.
- 653 20. Rehackova L, Araújo-Soares V, Adamson AJ, Steven S, Taylor R, Sniehotta FF.  
654 Acceptability of a very-low-energy diet in Type 2 diabetes: Patient experiences and behaviour  
655 regulation. Diabet Med. 2017;34(11):1554-67. doi: 10.1111/dme.13426. PubMed PMID:  
656 28727247; PubMed Central PMCID: PMC5656912.
- 657 21. Lim EL, Hollingsworth KG, Aribisala BS, Chen MJ, Mathers JC, Taylor R. Reversal of  
658 type 2 diabetes: Normalisation of beta cell function in association with decreased pancreas and

- 659 liver triacylglycerol. *Diabetologia*. 2011;54(10):2506-14. Epub 2011/06/10. doi:  
660 10.1007/s00125-011-2204-7. PubMed PMID: 21656330; PubMed Central PMCID:  
661 PMC3168743.
- 662 22. Steven S, Hollingsworth KG, Small PK, Woodcock SA, Pucci A, Aribisala B, et al.  
663 Weight Loss Decreases Excess Pancreatic Triacylglycerol Specifically in Type 2 Diabetes.  
664 *Diabetes Care*. 2016;39(1):158-65. Epub 2015/12/03. doi: 10.2337/dc15-0750. PubMed PMID:  
665 26628414.
- 666 23. Pan American Health Organization. Health in the Americas- Barbados PAHO/WHO;  
667 2017. Available from: <https://www.paho.org/salud-en-las-americas-2017/?p=1661>.
- 668 24. Adams OP, Carter AO. Knowledge, attitudes, practices, and barriers reported by patients  
669 receiving diabetes and hypertension primary health care in Barbados: A focus group study. *BMC*  
670 *Family Practice*. 2011;12(1):135. doi: 10.1186/1471-2296-12-135.
- 671 25. Pan American Health Organization. Health Systems Profile Barbados: PAHO/WHO;  
672 2008.
- 673 26. Bandura A. *Self-Efficacy: The Exercise of Control*. New York: Freeman; 1997.
- 674 27. Glanz K, Rimer B, Viswanath K. *Health behavior and health education : Theory,*  
675 *research, and practice*. San Francisco, CA: Jossey-Bass; 2008.
- 676 28. Garth H. *Food and Identity in the Caribbean*. London: Bloomsbury; 2013.
- 677 29. Houston LM. *Food culture in the Caribbean*. Westport, Conn.: Greenwood Press; 2005.
- 678 30. Scott P. Lay beliefs and the management of disease amongst West Indians with diabetes.  
679 *Health & social care in the community*. 1998;6(6):407-19.

- 680 31. Punzalan C, Paxton KC, Guentzel H, Bluthenthal RN, Staunton AD, Mejia G, et al.  
681 Seeking community input to improve implementation of a lifestyle modification program. *Ethn*  
682 *Dis.* 2006;16(1 Suppl 1):S79-88. PubMed PMID: 16681131.
- 683 32. Hushie M. Exploring the barriers and facilitators of dietary self-care for type 2 diabetes:  
684 A qualitative study in Ghana. *Health Promot Perspect.* 2019;9(3):223-32. doi:  
685 10.15171/hpp.2019.31. PubMed PMID: 31508343.
- 686 33. Booth A, Lowis C, Dean M, Hunter SJ, McKinley MC. Diet and physical activity in the  
687 self-management of type 2 diabetes: Barriers and facilitators identified by patients and health  
688 professionals. *Primary Health Care Research & Development.* 2013;14(3):293-306.
- 689 34. Vijan S, Stuart NS, Fitzgerald JT, Ronis DL, Hayward RA, Slater S, et al. Barriers to  
690 following dietary recommendations in Type 2 diabetes. *Diabet Med.* 2005;22(1):32-8. doi:  
691 10.1111/j.1464-5491.2004.01342.x. PubMed PMID: 15606688.
- 692 35. Reyes J, tripp-reimer T, Parker E, Muller B, Laroche H. Factors Influencing Diabetes  
693 Self-Management Among Medically Underserved Patients With Type II Diabetes. *Global*  
694 *Qualitative Nursing Research.* 2017;4:233339361771309. doi: 10.1177/2333393617713097.
- 695 36. Serour M, Alqhenaei H, Al-Saqabi S, Mustafa A-R, Ben-Nakhi A. Cultural factors and  
696 patients' adherence to lifestyle measures. *Br J Gen Pract.* 2007;57(537):291-5. PubMed PMID:  
697 17394732.
- 698 37. Albarran NB, Ballesteros MN, Morales GG, Ortega MI. Dietary behavior and type 2  
699 diabetes care. *Patient Education and Counseling.* 2006;61(2):191-9. doi:  
700 <https://doi.org/10.1016/j.pec.2005.03.008>.

- 701 38. Mansyur CL, Rustveld LO, Nash SG, Jibaja-Weiss ML. Social factors and barriers to  
702 self-care adherence in Hispanic men and women with diabetes. *Patient Educ Couns*.  
703 2015;98(6):805-10. Epub 20150310. doi: 10.1016/j.pec.2015.03.001. PubMed PMID: 25819551.
- 704 39. Hosein M, Jazayeri S, Pipelzadeh M. Barriers to diet self-care in outpatients with type 2  
705 diabetes in Iran. *Pakistan Journal of Medical Sciences* 2006;22(4):412-5.
- 706 40. Browne JL, Ventura A, Mosely K, Speight J. 'I call it the blame and shame disease': A  
707 qualitative study about perceptions of social stigma surrounding type 2 diabetes. *BMJ Open*.  
708 2013;3(11):e003384. doi: 10.1136/bmjopen-2013-003384.
- 709 41. DiZazzo-Miller R, Pociask FD, Bertran EA, Fritz HA, Abbas M, Tarakji S, et al.  
710 Diabetes Is Devastating, and Insulin Is a Death Sentence: Provider Perspectives of Diabetes Self-  
711 Management in Arab-American Patients. *Clin Diabetes*. 2017;35(1):43-50. doi: 10.2337/cd15-  
712 0030. PubMed PMID: 28144045.
- 713 42. Booth A, Lowis C, Dean M, Hunter S, McKinley M. Diet and physical activity in the  
714 self-management of type 2 diabetes: barriers and facilitators identified by patients and health  
715 professionals. *Primary health care research & development*. 2013;14:293-306. doi:  
716 10.1017/S1463423612000412.
- 717 43. Dye CJ, Haley-Zitlin V, Willoughby D. Insights From Older Adults With Type 2  
718 Diabetes: Making Dietary and Exercise Changes. *The Diabetes Educator*. 2003;29(1):116-27.  
719 doi: 10.1177/014572170302900116.
- 720 44. Chlebowy DO, Hood S, LaJoie AS. Facilitators and barriers to self-management of type 2  
721 diabetes among urban African American adults: Focus group findings. *Diabetes Educ*.  
722 2010;36(6):897-905. Epub 20101025. doi: 10.1177/0145721710385579. PubMed PMID:  
723 20974906.

- 724 45. Abbott P, Davison J, Moore L, Rubinstein R. Barriers and enhancers to dietary behaviour  
725 change for Aboriginal people attending a diabetes cooking course. *Health Promotion Journal of*  
726 *Australia*. 2010;21(1):33-8.
- 727 46. Henry F. The obesity epidemic: A major threat to Caribbean development: The case for  
728 public policies. *Cajanus*. 2004;37:1-50.
- 729 47. Food and Agriculture Organization of the United Nations. State of food insecurity in the  
730 CARICOM Caribbean. Meeting the 2015 hunger targets: Taking stock of uneven progress.  
731 Barbados: Food and Agriculture Organization of the United Nations 2015.
- 732 48. Guariguata L, Rouwette EA, Murphy MM, Saint Ville A, Dunn LL, Hickey GM, et al.  
733 Using Group Model Building to Describe the System Driving Unhealthy Eating and Identify  
734 Intervention Points: A Participatory, Stakeholder Engagement Approach in the Caribbean.  
735 *Nutrients*. 2020;12(2). Epub 20200131. doi: 10.3390/nu12020384. PubMed PMID: 32024025;  
736 PubMed Central PMCID: PMC7071222.
- 737 49. Barry T, Gahman L, Greenidge A, Mohamed A. Wrestling with race and colonialism in  
738 Caribbean agriculture: Toward a (food) sovereign and (gender) just future. *Geoforum*.  
739 2020;109:106-10. doi: <https://doi.org/10.1016/j.geoforum.2019.12.018>.
- 740 50. Glanz K, Rimer BK, Viswanath K. Health behavior and health education : theory,  
741 research, and practice. San Francisco, CA: Jossey-Bass; 2008.
- 742 51. Fisher EB, Brownson CA, O'Toole ML, Shetty G, Anwuri VV, Glasgow RE. Ecological  
743 approaches to self-management: the case of diabetes. *Am J Public Health*. 2005;95(9):1523-35.  
744 Epub 20050728. doi: 10.2105/ajph.2005.066084. PubMed PMID: 16051929; PubMed Central  
745 PMCID: PMC1449392.

- 746 52. Gomes CS, Matozinhos FP, Mendes LL, Pessoa MC, Velasquez-Melendez G. Physical  
747 and Social Environment Are Associated to Leisure Time Physical Activity in Adults of a  
748 Brazilian City: A Cross-Sectional Study. *PloS one*. 2016;11(2):e0150017-e. doi:  
749 10.1371/journal.pone.0150017. PubMed PMID: 26915091.
- 750 53. Kahn EB, Ramsey LT, Brownson RC, Heath GW, Howze EH, Powell KE, et al. The  
751 effectiveness of interventions to increase physical activity. A systematic review. *Am J Prev Med*.  
752 2002;22(4 Suppl):73-107. doi: 10.1016/s0749-3797(02)00434-8. PubMed PMID: 11985936.
- 753 54. Matson-Koffman DM, Brownstein JN, Neiner JA, Greaney ML. A site-specific literature  
754 review of policy and environmental interventions that promote physical activity and nutrition for  
755 cardiovascular health: What works? *Am J Health Promot*. 2005;19(3):167-93. doi:  
756 10.4278/0890-1171-19.3.167. PubMed PMID: 15693346.
- 757 55. Laranjo L, Neves AL, Costa A, Ribeiro RT, Couto L, Sá AB. Facilitators, barriers and  
758 expectations in the self-management of type 2 diabetes—a qualitative study from Portugal.  
759 *European Journal of General Practice*. 2015;21(2):103-10.
- 760 56. Murrock CJ, Taylor E, Marino D. Dietary Challenges of Managing Type 2 Diabetes in  
761 African-American Women. *Women & Health*. 2013;53(2):173-84. doi:  
762 10.1080/03630242.2012.753979.
- 763 57. Albarran N, Ballesteros MN, Morales G, Ortega M-I. Dietary behavior and type 2  
764 diabetes care. Patient education and counseling. 2006;61:191-9. doi: 10.1016/j.pec.2005.03.008.
- 765 58. Gutschall M, Onega LL, Wright WK. Patients' perspectives about dietary maintenance in  
766 Type 2 diabetes. *Topics in Clinical Nutrition*. 2011;26(3):180-9.

- 767 59. Vassilev I, Rogers A, Blickem C, Brooks H, Kapadia D, Kennedy A, et al. Social  
768 networks, the ‘work’ and work force of chronic illness self-management: A survey analysis of  
769 personal communities. PLoS One. 2013;8(4):e59723.
- 770 60. Vaccaro JA, Exebio JC, Zarini GG, Huffman FG. The role of family/friend social support  
771 in diabetes self-management for minorities with type 2 diabetes. World Journal of Nutrition and  
772 Health. 2014;2(1):1-9.
- 773 61. Barrera M, Toobert DJ, Strycker LA. Relative contributions of naturalistic and  
774 constructed support: two studies of women with type 2 diabetes. J Behav Med. 2014;37(1):59-  
775 69.
- 776
